# Supplementary material for: S 47445 Produces Antidepressant- and Anxiolytic-Like Effects through Neurogenesis Dependent and Independent Mechanisms
Source: Front Pharmacol. 2017 Jul 19;8:462. doi: 10.3389/fphar.2017.00462 (PMC5515821; doi:10.3389/fphar.2017.00462)
Supplement: Supplementary file 2 [file Table_1.XLSX]

## Sheet: Mice
	Supplementary Table 1: Overall statistical results of experiments performed in mice
														Treatment Factor
		Test	Parameter	Treatment groups number	Total number of samples	One-Way ANOVA F-value	One-Way ANOVA P-value	One-Way ANOVA with Repeated Measures (F-value Treatment Factor)	One-Way ANOVA with Repeated Measures (P-Value Treatment Factor)	One-Way ANOVA with Repeated Measures (F-value Time Factor)	One-Way ANOVA with Repeated Measures (P-value Time Factor)	One-Way ANOVA with Repeated Measures (F-value Interaction)	One-Way ANOVA with Repeated Measures (P-value Interaction)		Cort/Veh vs Veh/Veh	Cort/Flx vs Veh/Veh	Cort/S47445(0.3) vs Veh/Veh	Cort/S47445(1) vs Veh/Veh	Cort/S47445(3) vs Veh/Veh	Cort/S47445(10) vs Veh/Veh		Cort/Flx vs Cort/Veh	Cort/S47445(0.3) vs Cort/Veh	Cort/S47445(1) vs Cort/Veh	Cort/S47445(3) vs Cort/Veh	Cort/S47445(10) vs Cort/Veh		Cort/S47445(0.3) vs Cort/Flx	Cort/S47445(1) vs Cort/Flx	Cort/S47445(3) vs Cort/Flx	Cort/S47445(10) vs Cort/Flx
	Figure 1
	1B	Open Field	Time in the center	7	104	3.432	0.0041								0.0024	0.7136	0.0799	0.8919	0.0734	0.0077		0.0084	0.1821	0.0016	0.1954	0.6971		0.1735	0.6168	0.1616	0.0231
	1C	Elevated Plus Maze	Time in Open Arms	7	104	3.184	0.0068								0.0003	0.3588	0.0044	0.1704	0.1978	0.0885		0.0061	0.3826	0.0177	0.0142	0.0408		0.0549	0.6646	0.7255	0.4441
	1D	Coat State	Fur Coat state	7	104	11.224	<0.0001								< 0.0001	< 0.0001	0.0011	0.0817	0.3813	0.0428		0.0947	0.0011	< 0.0001	< 0.0001	< 0.0001		0.1073	0.0018	< 0.0001	0.0043
	1E	Splash Test	Grooming duration	7	102	6.497	<0.0001								<0.0001	0.7423	0.0001	0.0069	0.4907	0.6776		0.0003	0.8739	0.1661	0.0013	0.0003		0.0005	0.0191	0.7178	0.9365
	1F	Forced Swimming Test	Immobility	7	102	11.92	<0.0001								0.4968	< 0.0001	0.0126	0.2673	0.8411	0.0008		<0.0001	0.0658	0.6656	0.6492	<0.0001		<0.0001	<0.0001	<0.0001	0.4441
	1G	Novelty Suppressed Feeding	Latency to feed	7	102	5.521	<0.0001								<0.0001	0.1515	0.0002	0.0006	< 0.0001	0.0053		0.0026	0.5051	0.2949	0.79	0.0814		0.0169	0.0427	0.0078	0.1776
	1H	Emotionality Score	Emotionality Score	7	102	10.18	<0.0001								< 0.0001	0.124	< 0.0001	< 0.0001	0.0003	0.006		< 0.0001	0.4567	0.0845	0.0118	0.0006		< 0.0001	0.0028	0.0269	0.212
	Supplementary Figure 1A	Open Field	Entries in the center	7	104	3.962	0.0014								<0.0001	0.0034	0.016	0.0695	0.0003	0.0012		0.2618	0.0836	0.02	0.6221	0.3962		0.5571	0.2347	0.5218	0.7715
	Supplementary Figure 1B	Open Field	Total Ambulatory Distance	7	104	4.312	0.0007								0.0103	0.0945	0.2539	0.5861	0.074	0.0269		<0.0001	0.1452	0.0411	0.4199	0.713		0.0059	0.0284	0.0008	0.0002
	Supplementary Figure 1C	Open Field	Distance Ratio	7	104	2.286	0.0416								0.0078	0.5944	0.2157	0.9502	0.1881	0.026		0.0354	0.1451	0.0066	0.1679	0.6504		0.4917	0.5527	0.4442	0.0948
	Supplementary Figure 1D	Elevated Plus Maze	Open Arms Entries	7	104	2.917	0.0117								0.0021	0.735	0.0485	0.4635	0.675	0.2503		0.0009	0.2503	0.0175	0.0074	0.0485		0.0234	0.2906	0.4534	0.1432
	Supplementary Figure 1E	Elevated Plus Maze	Total Distance	7	104	1.227	0.2992								0.226	0.492	0.9464	0.8313	0.8019	0.1314		0.0622	0.2525	0.1554	0.336	0.7625		0.4515	0.6324	0.3512	0.0313
	Supplementary Figure 1F	Elevated Plus Maze	Ratio of Entries	7	104	2.082	0.0622
	Supplementary Figure 1G	Tail Suspension Test	Immobility	7	102	2.88	0.0127								0.485	0.0123	0.9415	0.5595	0.0355	0.8496		0.0016	0.5318	0.2013	0.006	0.3751		0.0101	0.0511	0.717	0.0201
	Figure 3
	3A	Proliferation	Ki67 positive cells (proliferation)	7	33	3.924	0.0063								0.064	0.0308	0.1751	0.6885	0.9047	0.2851		0.0004	0.5405	0.1327	0.0507	0.008		0.0011	0.0124	0.04	0.2984
	3B	Survival	BrdU positive cells (survival)	7	33	3.756	0.008								0.069	0.3947	0.1681	0.3471	0.0526	0.3292		0.0117	0.5803	0.0095	0.001	0.0088		0.0308	0.9273	0.2352	0.8984
	3C	Maturation	Total DCX Cells	7	33	11.84	<0.0001								0.9925	< 0.0001	0.5172	0.911	0.727	0.4701		<0.0001	0.4862	0.9135	0.7176	0.4522		<0.0001	<0.0001	<0.0001	<0.0001
	3D	Maturation	DCX cells with tertiary dendrites	7	32	18.285	<0.0001								0.5924	< 0.0001	0.5924	0.6386	0.2814	0.0682		<0.0001	>0.9999	0.2905	0.0879	0.0171		<0.0001	<0.0001	<0.0001	<0.0001
	3E	Maturation	Maturation Index	7	32	8.491	<0.0001								0.1884	< 0.0001	0.9129	0.4862	0.0505	0.0046		<0.0001	0.1998	0.0383	0.0011	<0.0001		<0.0001	<0.0001	0.0002	0.0047
	3F and Supplementary Figure 2C	Maturation	Dendritic Length	7	21			7.01	<0.0001	512.9	<0.0001	2.197	<0.0001
	3F and Supplementary Figure 2C	Maturation	Dendritic Length at 10µm												0.9321	0.695	0.6825	0.9456	0.9185	0.9321		0.759	0.6211	0.9864	0.9864	> 0.9999		0.4232	0.746	0.772	0.759
	3F and Supplementary Figure 2C	Maturation	Dendritic Length at 20µm												0.6332	0.3149	0.7331	0.5063	0.6454	0.8915		0.5972	0.8915	0.8512	0.9864	0.7331		0.5063	0.7331	0.5855	0.3849
	3F and Supplementary Figure 2C	Maturation	Dendritic Length at 30µm												0.069	0.2833	0.4955	0.4534	0.19	0.4038		0.4534	0.2539	0.2833	0.6091	0.3232		0.695	0.746	0.8114	0.8114
	3F and Supplementary Figure 2C	Maturation	Dendritic Length at 40µm												0.0325	0.7331	0.2758	0.0924	0.0251	0.4135		0.0134	0.291	0.6453	0.9185	0.1843		0.1529	0.0433	0.01	0.2469
	3F and Supplementary Figure 2C	Maturation	Dendritic Length at 50µm												0.0091	0.064	0.0013	0.0075	0.0055	0.5508		< 0.0001	0.5395	0.9456	0.8646	0.0433		< 0.0001	< 0.0001	< 0.0001	0.0147
	3F and Supplementary Figure 2C	Maturation	Dendritic Length at 60µm												< 0.0001	0.1099	< 0.0001	0.0005	0.0549	0.9864		< 0.0001	0.4534	0.19	0.0036	< 0.0001		< 0.0001	< 0.0001	0.0005	0.1062
	3F and Supplementary Figure 2C	Maturation	Dendritic Length at 70µm												0.0008	0.0008	0.0528	0.0353	0.6332	0.5172		< 0.0001	0.1481	0.2017	0.0001	< 0.0001		< 0.0001	< 0.0001	0.0038	0.0064
	3F and Supplementary Figure 2C	Maturation	Dendritic Length at 80µm												0.069	0.0002	0.1026	0.3068	0.0488	0.0957		< 0.0001	0.8512	0.4232	0.0002	0.0006		< 0.0001	< 0.0001	0.0716	0.0353
	3F and Supplementary Figure 2C	Maturation	Dendritic Length at 90µm												0.0286	0.0593	0.0991	0.3666	0.3488	0.7331		< 0.0001	0.5855	0.1958	0.0019	0.0116		0.0005	0.0055	0.3401	0.1217
	3F and Supplementary Figure 2C	Maturation	Dendritic Length at 100µm												0.0743	0.5283	0.0593	0.5172	0.3576	0.8646		0.0161	0.9185	0.2539	0.0071	0.0508		0.0122	0.2017	0.772	0.6453
	3F and Supplementary Figure 2C	Maturation	Dendritic Length at 110µm												0.5172	0.5508	0.2611	0.5623	0.1026	0.3401		0.214	0.6332	0.9456	0.023	0.1099		0.086	0.2401	0.2989	0.7204
	3F and Supplementary Figure 2C	Maturation	Dendritic Length at 120µm												0.8512	0.905	0.3401	0.2989	0.5623	0.2684		0.759	0.4432	0.3943	0.4432	0.1958		0.2833	0.2469	0.6453	0.3232
	3F and Supplementary Figure 2C	Maturation	Dendritic Length at 130µm												0.9321	0.9456	0.5283	0.4534	0.5623	0.2989		0.8781	0.4742	0.4038	0.6211	0.3401		0.5738	0.4955	0.5172	0.2684
	3F and Supplementary Figure 2C	Maturation	Dendritic Length at 140µm												0.8512	0.8512	0.905	0.772	0.5623	0.2539		0.7076	0.759	0.6332	0.695	0.3401		0.9456	0.9185	0.4432	0.1843
	3F and Supplementary Figure 2C	Maturation	Dendritic Length at 150µm												0.9321	0.9321	0.9185	0.9185	0.8512	0.6091		0.8646	0.8512	0.8512	0.9185	0.67		0.9864	0.9864	0.785	0.5508
	3F and Supplementary Figure 2C	Maturation	Dendritic Length at 160µm												0.9728	0.9728	0.9728	0.9728	0.9592	0.785		> 0.9999	> 0.9999	> 0.9999	0.9321	0.759		> 0.9999	> 0.9999	0.9321	0.759
	3F and Supplementary Figure 2C	Maturation	Dendritic Length at 170µm												> 0.9999	> 0.9999	> 0.9999	> 0.9999	> 0.9999	0.8512		> 0.9999	> 0.9999	> 0.9999	> 0.9999	0.8512		> 0.9999	> 0.9999	> 0.9999	0.8512
	3F and Supplementary Figure 2C	Maturation	Dendritic Length at 180µm												> 0.9999	> 0.9999	> 0.9999	> 0.9999	> 0.9999	0.9592		> 0.9999	> 0.9999	> 0.9999	> 0.9999	0.9592		> 0.9999	> 0.9999	> 0.9999	0.9592
	3G and Supplementary Figure 2D	Maturation	Dendritic Intersection	7	21			8.126	0.0006	492.8	<0.0001	2.15	<0.0001
	3G and Supplementary Figure 2D	Maturation	Dendritic Intersection at 10µm												> 0.9999	> 0.9999	0.771	0.9227	> 0.9999	0.8462		> 0.9999	0.771	0.9227	> 0.9999	0.8462		0.771	0.9227	> 0.9999	0.8462
	3G and Supplementary Figure 2D	Maturation	Dendritic Intersection at 20µm												0.208	0.1465	0.383	0.208	0.208	0.771		0.8462	0.698	> 0.9999	> 0.9999	0.3324		0.5607	0.8462	0.8462	0.245
	3G and Supplementary Figure 2D	Maturation	Dendritic Intersection at 30µm												0.1215	0.8462	0.6277	0.245	0.245	0.698		0.1752	0.2865	0.698	0.698	0.245		0.771	0.3324	0.3324	0.8462
	3G and Supplementary Figure 2D	Maturation	Dendritic Intersection at 40µm												0.0264	0.438	0.0817	0.0532	0.0206	0.9227		0.0029	0.6277	0.771	0.9227	0.0206		0.0122	0.007	0.0021	0.4973
	3G and Supplementary Figure 2D	Maturation	Dendritic Intersection at 50µm												0.0008	0.1752	0.0039	0.0122	0.0336	0.5607		< 0.0001	0.6277	0.383	0.208	< 0.0001		< 0.0001	0.0001	0.0006	0.438
	3G and Supplementary Figure 2D	Maturation	Dendritic Intersection at 60µm												< 0.0001	0.0159	0.0011	0.0015	0.4973	0.5607		< 0.0001	0.0817	0.0662	< 0.0001	< 0.0001		< 0.0001	< 0.0001	0.0021	0.0662
	3G and Supplementary Figure 2D	Maturation	Dendritic Intersection at 70µm												0.1752	< 0.0001	0.438	0.5607	0.0336	0.007		< 0.0001	0.5607	0.438	0.0006	< 0.0001		< 0.0001	< 0.0001	0.0029	0.0159
	3G and Supplementary Figure 2D	Maturation	Dendritic Intersection at 80µm												0.0662	0.0006	0.0817	0.438	0.0532	0.4973		< 0.0001	0.9227	0.2865	0.0002	0.0122		< 0.0001	< 0.0001	0.1215	0.0052
	3G and Supplementary Figure 2D	Maturation	Dendritic Intersection at 90µm												0.0336	0.383	0.0425	0.438	0.438	0.6277		0.0029	0.9227	0.1752	0.0039	0.1		0.0039	0.1	0.9227	0.1752
	3G and Supplementary Figure 2D	Maturation	Dendritic Intersection at 100µm												0.3324	0.5607	0.245	0.438	0.1752	0.438		0.1215	0.8462	0.8462	0.0206	0.0817		0.0817	0.1752	0.438	0.8462
	3G and Supplementary Figure 2D	Maturation	Dendritic Intersection at 110µm												0.771	0.698	0.3324	0.3324	0.245	0.2865		0.4973	0.4973	0.4973	0.1465	0.1752		0.1752	0.1752	0.438	0.4973
	3G and Supplementary Figure 2D	Maturation	Dendritic Intersection at 120µm												0.698	0.771	0.5607	0.438	0.3324	0.208		0.9227	0.3324	0.245	0.5607	0.383		0.383	0.2865	0.4973	0.3324
	3G and Supplementary Figure 2D	Maturation	Dendritic Intersection at 130µm												> 0.9999	0.698	0.8462	0.5607	0.4973	0.245		0.698	0.8462	0.5607	0.4973	0.245		0.8462	0.8462	0.2865	0.1215
	3G and Supplementary Figure 2D	Maturation	Dendritic Intersection at 140µm												0.8462	0.9227	0.9227	0.8462	0.698	0.383		0.771	0.771	0.698	0.8462	0.4973		> 0.9999	0.9227	0.6277	0.3324
	3G and Supplementary Figure 2D	Maturation	Dendritic Intersection at 150µm												> 0.9999	0.9227	> 0.9999	0.9227	> 0.9999	0.771		0.9227	> 0.9999	0.9227	> 0.9999	0.771		0.9227	> 0.9999	0.9227	0.698
	3G and Supplementary Figure 2D	Maturation	Dendritic Intersection at 160µm												> 0.9999	> 0.9999	0.9227	> 0.9999	> 0.9999	0.771		> 0.9999	0.9227	> 0.9999	> 0.9999	0.771		0.9227	> 0.9999	> 0.9999	0.771
	3G and Supplementary Figure 2D	Maturation	Dendritic Intersection at 170µm												> 0.9999	> 0.9999	> 0.9999	> 0.9999	> 0.9999	0.9227		> 0.9999	> 0.9999	> 0.9999	> 0.9999	0.9227		> 0.9999	> 0.9999	> 0.9999	0.9227
	3G and Supplementary Figure 2D	Maturation	Dendritic Intersection at 180µm												> 0.9999	> 0.9999	> 0.9999	> 0.9999	> 0.9999	> 0.9999		> 0.9999	> 0.9999	> 0.9999	> 0.9999	> 0.9999		> 0.9999	> 0.9999	> 0.9999	> 0.9999
		Test	Parameter	Treatment groups number	Total number of samples	Two-Way ANOVA genotype factor F-value	Two-Way ANOVA genotype factor p-value	Two-Way ANOVA treatment factor F-value	Two-Way ANOVA treatment factor p-value	Two-Way ANOVA Interaction F-value	Two-Way ANOVA Interaction p-value		GFAP-TK- : Flx vs Veh	GFAP-TK- : S47445(10) vs Veh		GFAP-TK+ : Flx vs Veh	GFAP-TK+ : S47445(10) vs Veh		Veh: GFAP-TK+ vs GFAP-TK-	Flx: GFAP-TK+ vs GFAP-TK-	S47445: GFAP-TK+ vs GFAP-TK-
	Supplementary Figure 3A	Proliferation	Ki67 positive cells (proliferation)	6	22	105.1	<0.0001	3.02	0.0771	3.534	0.0535								0.0033	<0.0001	<0.0001
	Figure 4
	4B	Open Field	Time in the center	6	59	0.0012	0.9727	9.511	0.0003	2.254	0.1149		0.088	0.0001		0.0339	0.0709
	4C	Elevated Plus Maze	Time in Open Arms	6	59	0.21	0.6482	9.511	0.0003	0.5168	0.5994		0.1617	0.0006		0.1565	0.0154
	4D	Novelty Suppressed Feeding	Latency to feed	6	57	1.247	0.2694	1.468	0.24	2.684	0.0779
	4E	Splash Test	Grooming Duration	6	58	2.627	0.1111	15.71	<0.0001	1.007	0.3722		0.0003	0.0012		0.0004	0.0882
	4F	Western Blot	BDNF expression	6	26	0.1797	0.6762	4.641	0.0221	0.2876	0.7531		0.2317	0.0447		0.0424	0.0695
	Supplementary Figure 4A	Open Field	Entries in the center	6	59	8.024	0.0065	3.041	0.056	2.512	0.0906								0.1038	0.002	0.9668
	Supplementary Figure 4B	Open Field	Total Ambulatory Distance	6	59	11.42	0.0014	5.071	0.0097	8.646	0.0006		0.8979	0.498		0.0003	0.1704		0.1685	<0.0001	0.5019
	Supplementary Figure 4C	Open Field	Distance Ratio	6	59	1.325	0.2548	11.39	0.0001	0.2875	0.7513		0.0025	0.0014		0.0238	0.0102
	Supplementary Figure 4D	Elevated Plus Maze	Open Arms Entries	6	59	0.034	0.8541	3.547	0.0358	0.3189	0.7283		0.3924	0.1017		0.0527	0.0656
	Supplementary Figure 4E	Elevated Plus Maze	Total Distance	6	59	4.244	0.0443	6.741	0.0025	2.519	0.09		0.7279	0.3814		0.0015	0.5086		0.882	0.0044	0.6969
	Supplementary Figure 4F	Elevated Plus Maze	Ratio of Entries	6	59	2.39	0.128	5.452	0.007	1.622	0.2071		0.1213	0.1213		0.6484	0.0028
		Test	Parameter	Treatment groups number	Total number of samples	Log-rank (Mantel-Cox) test Chi square	Chi square P-value
	Supplementary Figure 1H	Novelty Suppressed Feeding	Latency to feed	7	102	75.78	<0.0001
